# Supplementary material
Source: publisher figshare collection journal article supplement (https://acs.figshare.com/ndownloader/files/24111305)

# Supporting Information

## **Assessing Air Quality and Public Health Benefits of New York City's Climate Action Plans**

*Sarah Johnson<sup>1\*</sup>, Jay Haney<sup>2</sup>, Lia Cairone<sup>3</sup>, Christopher Huskey<sup>1</sup>, Iyad Kheirbek<sup>4</sup>*

<sup>1</sup> New York City Department of Health and Mental Hygiene, Bureau of Environmental Surveillance and Policy, 125 Worth Street, CN-34E, New York, New York 10014, United States;

<sup>2</sup> ICF International, 126 Indian Hills Drive, Novato, California 94949, United States

<sup>3</sup> New York City Mayor's Office of Sustainability, 253 Broadway – 14<sup>th</sup> Floor, New York, New York 10007, United States

<sup>4</sup> C40 Cities Climate Leadership Group Inc., 120 Park Avenue - Floor 23, New York, New York 10017, United States

Supporting information includes 7 pages, 5 figures, and one table.

Figure S1. Flow chart of project components.

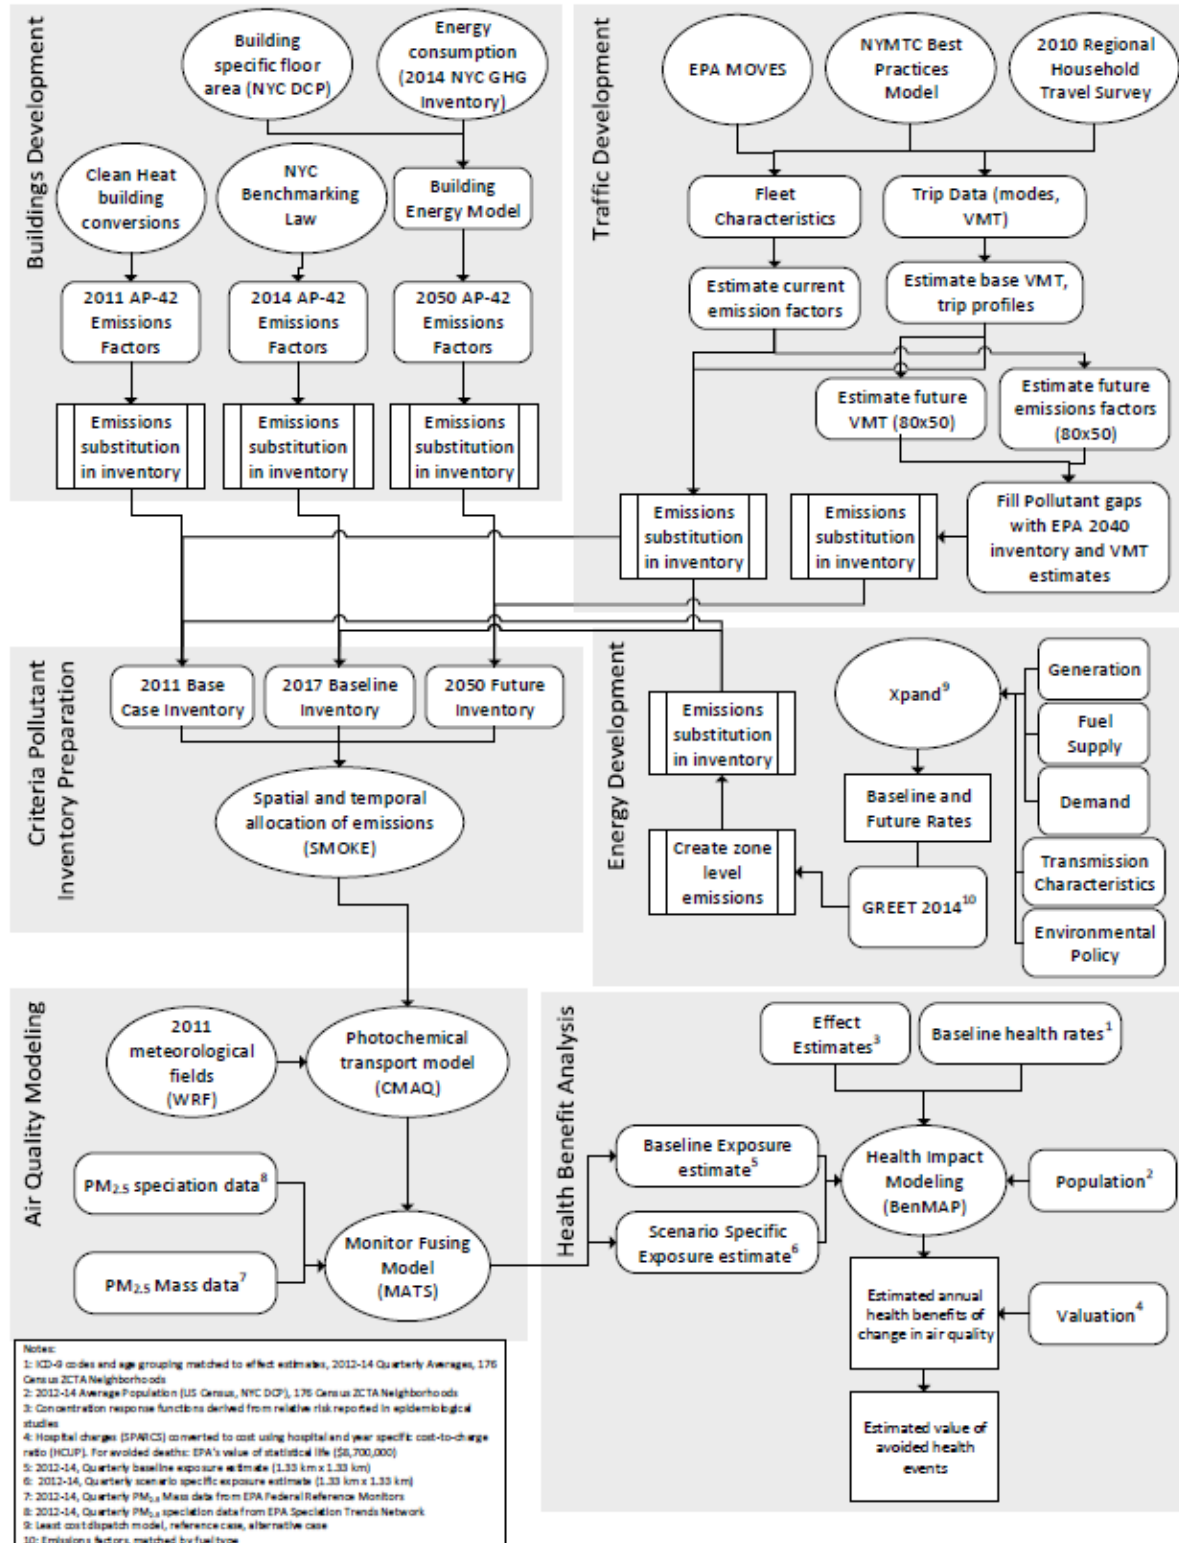

Table S1. Epidemiological studies used in estimating health benefits in BenMAP.

| Endpoint                                                 | Age Range | Location            | Qualifier         | Effect Estimate                                                                                                                                                                 | Reference                                                                                        |
|----------------------------------------------------------|-----------|---------------------|-------------------|---------------------------------------------------------------------------------------------------------------------------------------------------------------------------------|--------------------------------------------------------------------------------------------------|
| <b>Emergency Room Visits, Asthma</b>                     | 0-99      | New York City       | Warm/cool seasons | Relative risk of 1.23 (April-September) and 1.04 (October-March) per 25.4 $\mu\text{g}/\text{m}^3$ and 21.7 $\mu\text{g}/\text{m}^3$ respective increase in $\text{PM}_{2.5}$ , | Ito K, Thurston G, Silverman R. 2007.                                                            |
| <b>Hospitalizations through ED, Chronic Lung Disease</b> | 20-64     | Los Angeles county  | Year-round        | 2.2% increase in daily chronic respiratory disease hospitalizations per 10 $\mu\text{g}/\text{m}^3$ increase in $\text{PM}_{2.5}$                                               | Moolgavkar, S.H. 2000.                                                                           |
| <b>Hospitalizations through ED, Respiratory</b>          | 65-99     | 26 U.S. Communities | 4 seasons         | 1.79% (Winter), 4.34% (Spring), 1.26% (Summer), 1.52% (Fall) increase in respiratory disease hospitalizations per 10 $\mu\text{g}/\text{m}^3$ increase in $\text{PM}_{2.5}$     | Zanobetti, A., M. Franklin and J. Schwartz. 2009.                                                |
| <b>Hospitalizations through ED, Cardiovascular</b>       | 40-99     | New York City       | Warm/cool seasons | 0.8% (April-September) and 1.1% (October-March) increase in daily cardiovascular disease hospitalizations per 10 $\mu\text{g}/\text{m}^3$ increase in $\text{PM}_{2.5}$         | Ito K, Mathes R, Ross Z, Nadas A, Thurston G, Matte T. 2011.                                     |
| <b>Mortality, All Cause</b>                              | 30-99     | 116 US Cities       | Year-round        | Relative risk of 1.056 per 10 $\mu\text{g}/\text{m}^3$ increase in $\text{PM}_{2.5}$ .                                                                                          | Krewski, D., Jerrett, M., Burnett, R. T., Ma, R., Hughes, E., Shi, Y., ... & Thun, M. J. (2009). |
| <b>Mortality, All Cause</b>                              | 25-99     | 6 Eastern Cities    | Year-round        | Relative risk of 1.14 per 10 $\mu\text{g}/\text{m}^3$ increase in $\text{PM}_{2.5}$                                                                                             | Lepeule, J., Laden, F., Dockery, D., & Schwartz, J. (2012).                                      |

Figure S2. Spatial variation modeled by CMAQ compared to NYCCAS monitored values at intersecting locations and 2-week sampling periods. Spearman correlation coefficient.

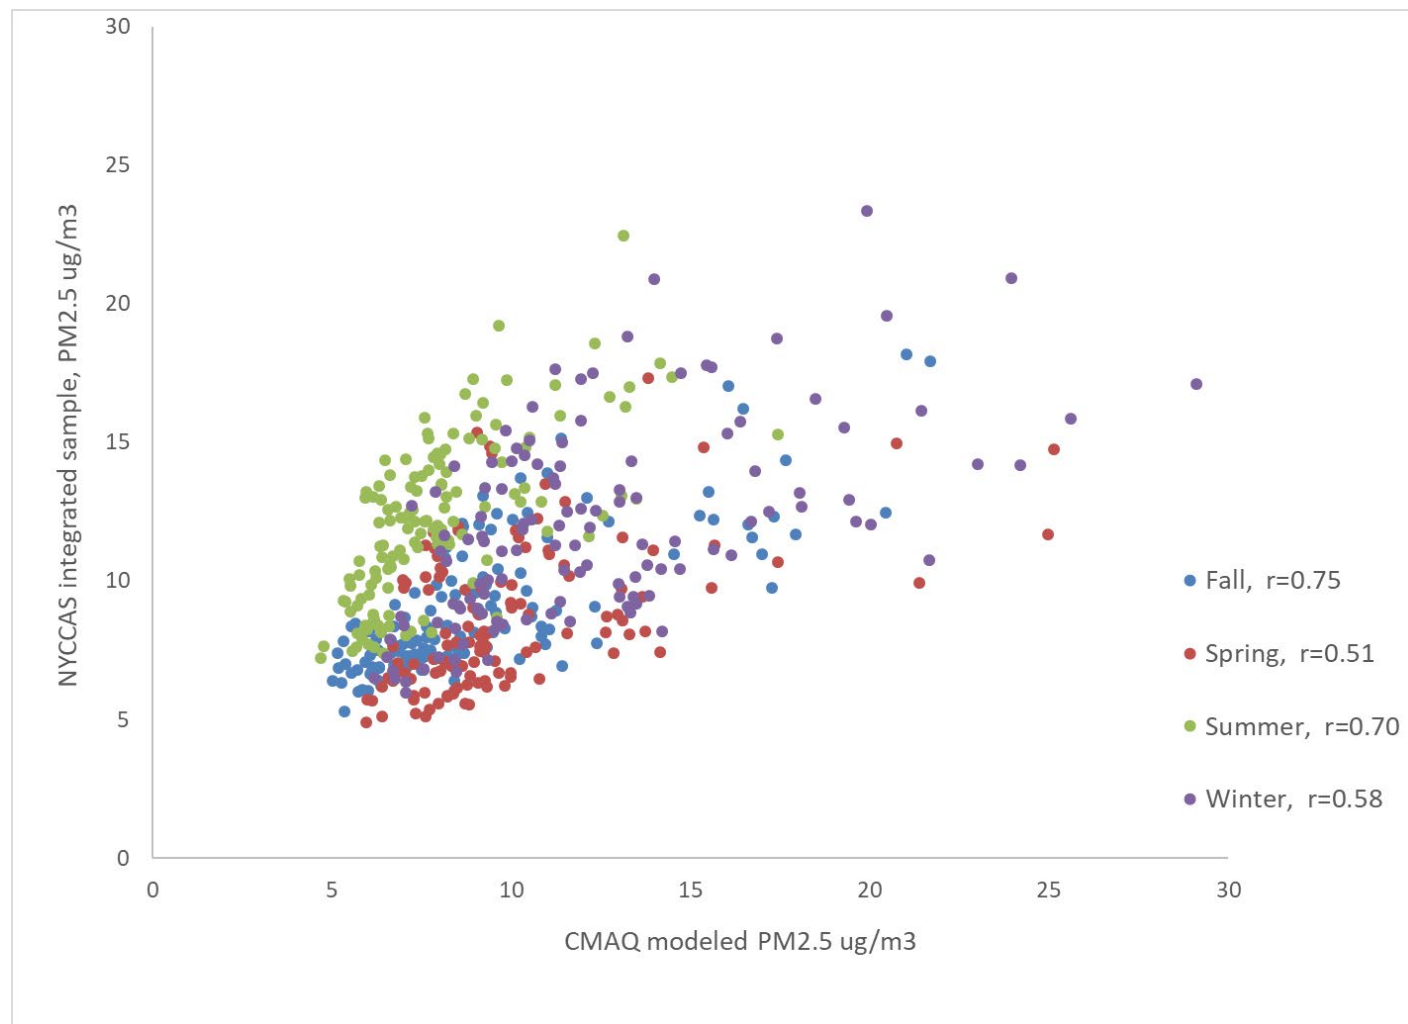

Figure S3. Census Tract counts of buildings burning No. 4 fuel oil as of 2019, NYC DEP permit data.

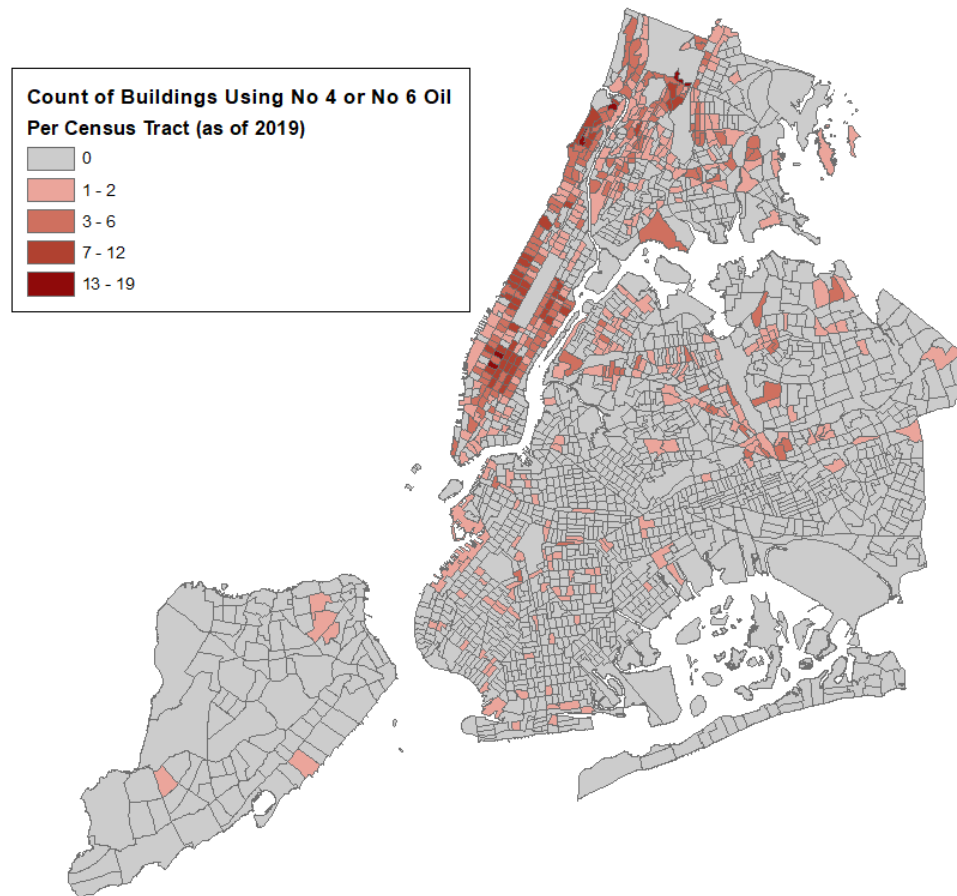

Figure S4. Baseline health outcome rates by ZCTA, 2012-2014 annual average.

**All - Cause Mortality  
Age 25 and older**

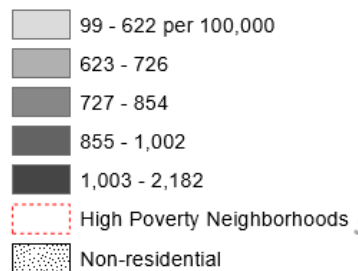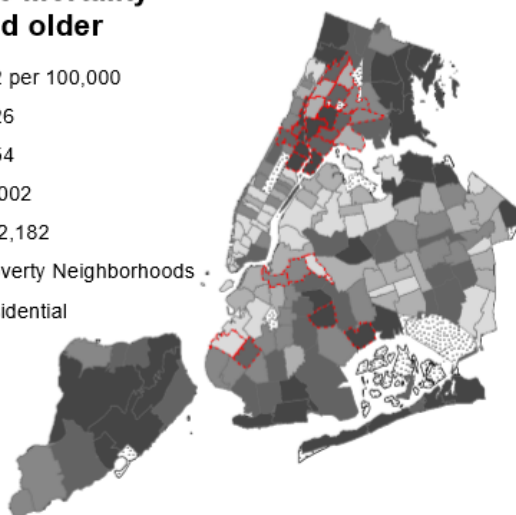

**Respiratory Hospitalizations  
Age 20 and older**

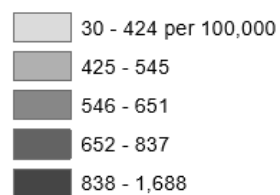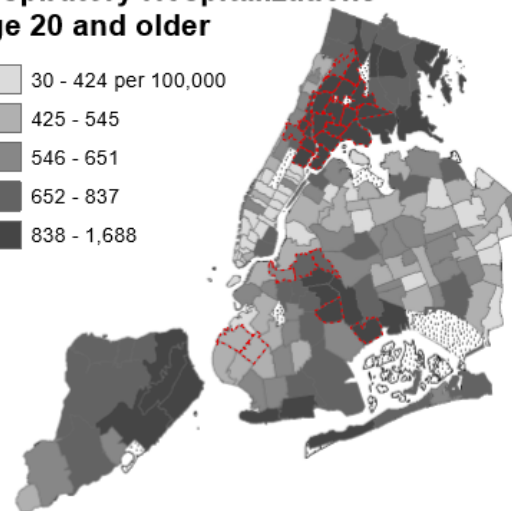

**Cardiovascular  
Hospitalizations  
Age 40 and older**

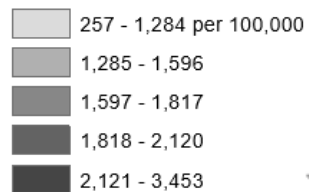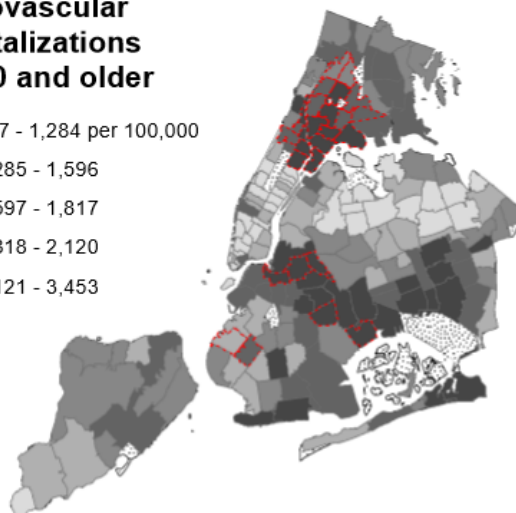

**Asthma ED Visits  
All ages**

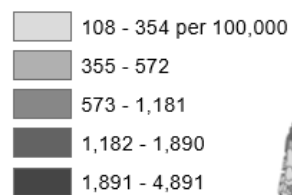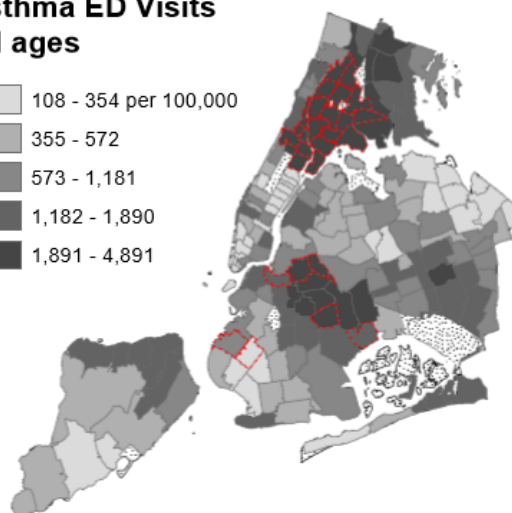

Figure S5. Spatial Pattern of avoided asthma ED visits by scenario.

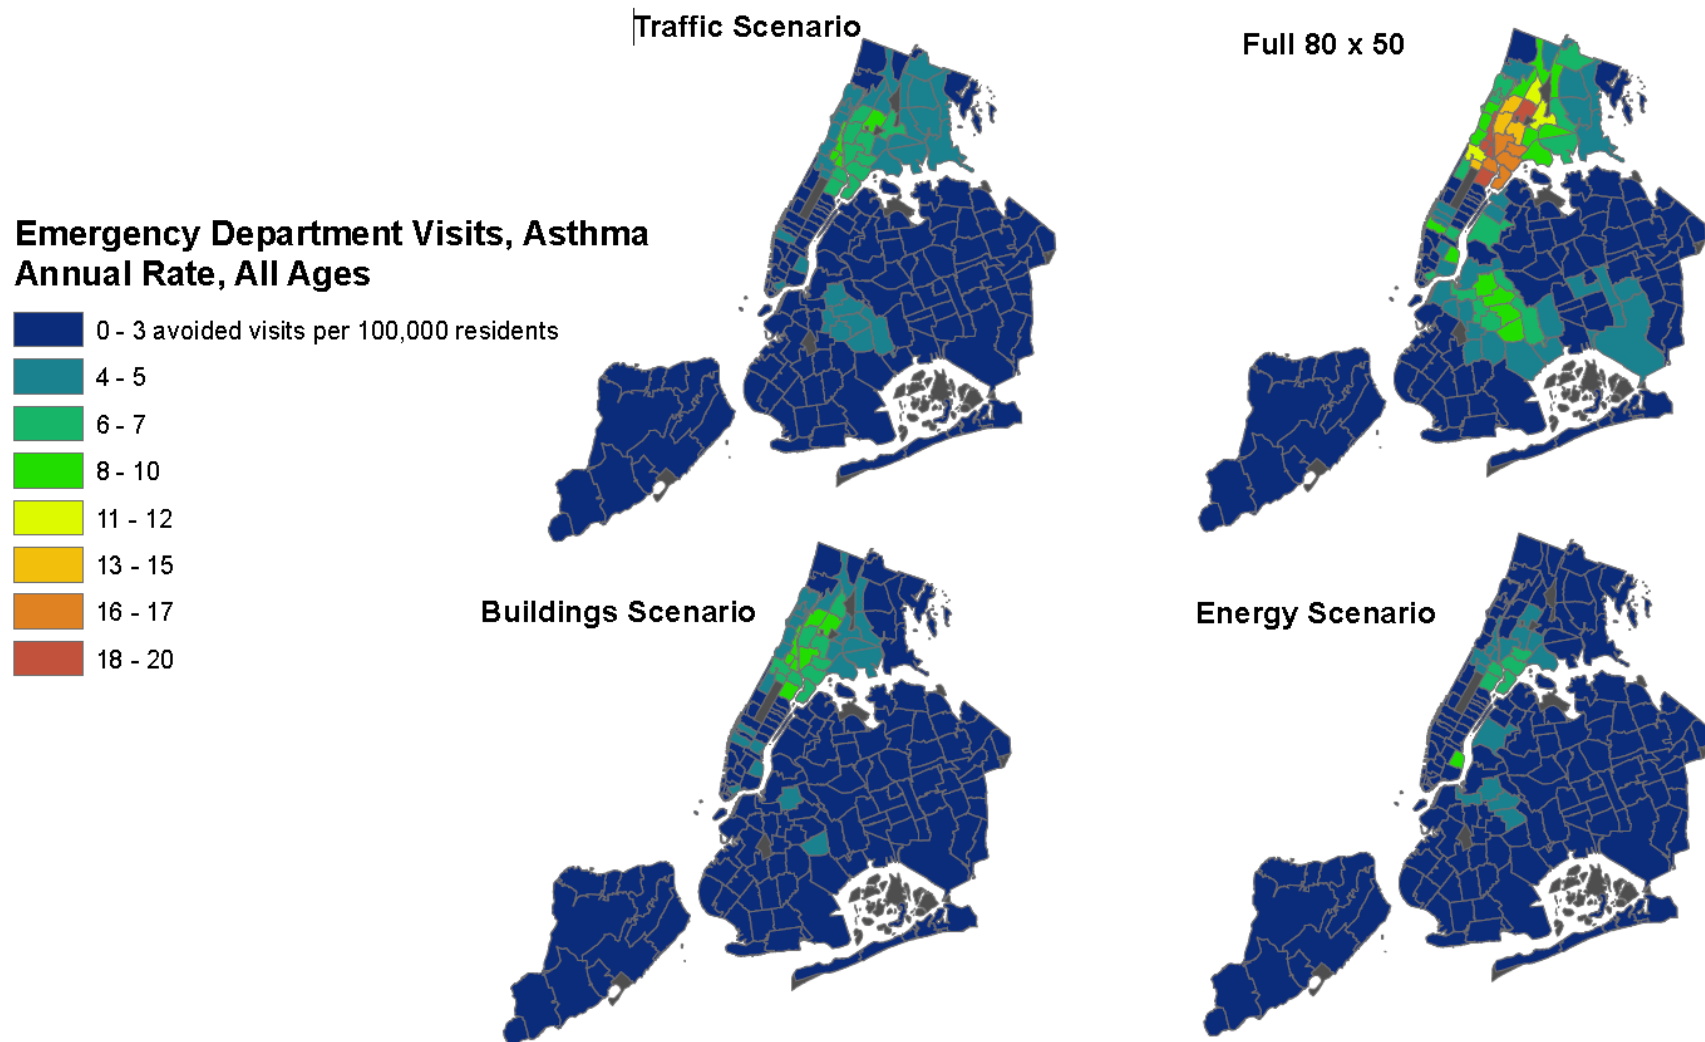

Supplement: Supplementary file 1 [file 24111305]
